# Supplementary material for: Classification of Alzheimer’s Disease Using Dual-Phase 18F-Florbetaben Image with Rank-Based Feature Selection and Machine Learning
Source: MDPI journal article supplement (doi:10.3390/app12157355), 2022-07-22
Supplement: s1 [file s1]

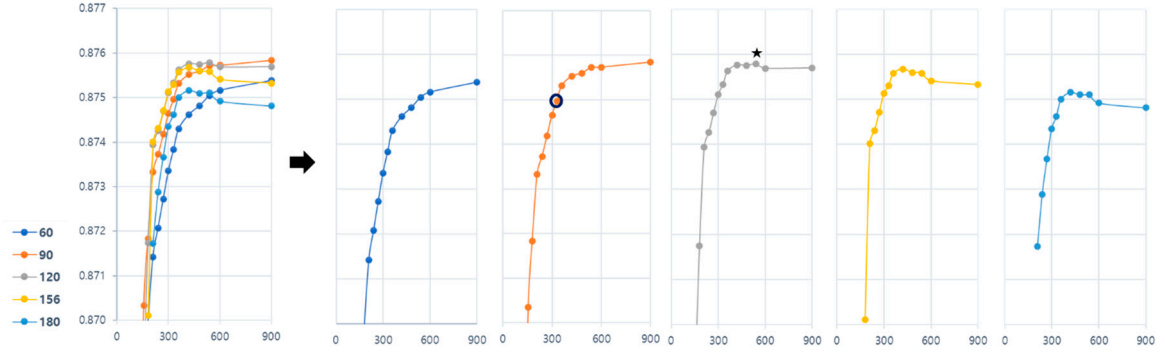

**Figure S1.** Correlation between early-phase  $^{18}\text{F}$  FBB PET SUVR and  $^{18}\text{F}$  FDG PET SUVR. These are correlation ( $\geq 0.875$ ) graphs of start time including early-phase  $^{18}\text{F}$  FBB PET (eFBB) SUVR and  $^{18}\text{F}$  FDG PET (FDG) SUVR. The X-axis shows the start time (60 s, 90 s, 120 s, 156 s, 180 s). Y-axis shows the correlation between eFBB SUVR and FDG SUVR. ★ indicates the highest correlation between eFBB and FDG (0.87579, time range: 120–540 s). ○ is the image time range (90–360 s) of eFBB that will replace FDG. In this range, the correlation is  $\geq 0.875$ , and excluding the noise range of the image, the minimum image length for readers is considered.
