# Supplementary material for: Classification of Alzheimer’s Disease Using Dual-Phase 18F-Florbetaben Image with Rank-Based Feature Selection and Machine Learning
Source: MDPI journal article supplement (doi:10.3390/app12157355), 2022-07-22
Supplement: s1 [file s1]

Archive with 1 entries (1 files):
- applsci-1790069-supplementary.pdf
